# Supplementary material for: Proactive In-Water Ship Hull Grooming as a Method to Reduce the Environmental Footprint of Ships
Source: Frontiers journal article supplement (doi:10.3389/fmars.2021.808549), 2022-02-18
Supplement: Table_1.xlsx [file Table_1.xlsx]

## Sheet: Schultz
NSTM Rating	Description	Ks (um)	RT50 (um)
0	Hydraulically smooth surface	0	0
0	Typical as applied antifouling coating	30	150
2021-10-20	Deteriorated coating or light slime	100	300
30	Heavy slime	300	600
40 – 60	Small calcareous fouling or weed	1000	1000
70 – 80	Medium calcareous fouling	3000	3000
90 – 100	Heavy calcareous fouling	10000	10000

## Sheet: NSTM
NSTM Rating	Category	Description	Ks (um)	RT50 (um)
0		A clean, foul-free surface; red and/or black AF paint or a bare metal surface.	0	0
10	Soft	Light shades of red and green (incipient slime). Bare metal and painted surfaces are visible beneath the fouling.	30	150
20	Soft	Slime as dark green patches with yellow or brown colored areas (advanced slime). Bare metal and painted surfaces may by obscured by the fouling.	100	300
30	Soft	Grass as filaments up to 3 inches (76 mm) in length, projections up to 1/4 inch (6.4 mm) in height; or a flat network of filaments, green, yellow, or brown in color; or soft non calcareous fouling such as sea cucumbers, sea grapes, or sea squirts projecting up to 1/4 inch (6.4 mm) in height. The fouling can not be easily wiped off by hand.	300	600
40	Hard	Calcareous fouling in the form of tubeworms less than 1⁄4 inch in diameter or height.	1000	1000
50	Hard	Calcareous fouling in the form of barnacles less than 1⁄4 inch in diameter or height.
60	Hard	Combination of tubeworms and barnacles, less than 1⁄4 inch (6.4 mm) in diameter or height.
70	Hard	Combination of tubeworms and barnacles, greater than 1⁄4 inch in diameter or height.	3000	3000
80	Hard	Tubeworms closely packed together and growing upright away from surface. Barnacles growing one on top of another, 1⁄4 inch or less in height. Calcareous shells appear clean or white in color.
90	Hard	Dense growth of tubeworms with barnacles, 1⁄4 inch or greater in height; Calcareous shells brown in color (oysters and mussels); or with slime or grass overlay.	10000	10000
100	Hard	All forms of fouling present, Soft and Hard, particularly soft seden- tary animals without calcareous covering (tunicates) growing over various forms of hard growth.
